# Supplementary material
Source: PubMed Central journal article supplement (PMC7437380)
Supplement: sj-pdf-1-ebm-10.1177_1535370220936964.pdf [file sj-pdf-1-ebm-10.1177_1535370220936964.pdf]

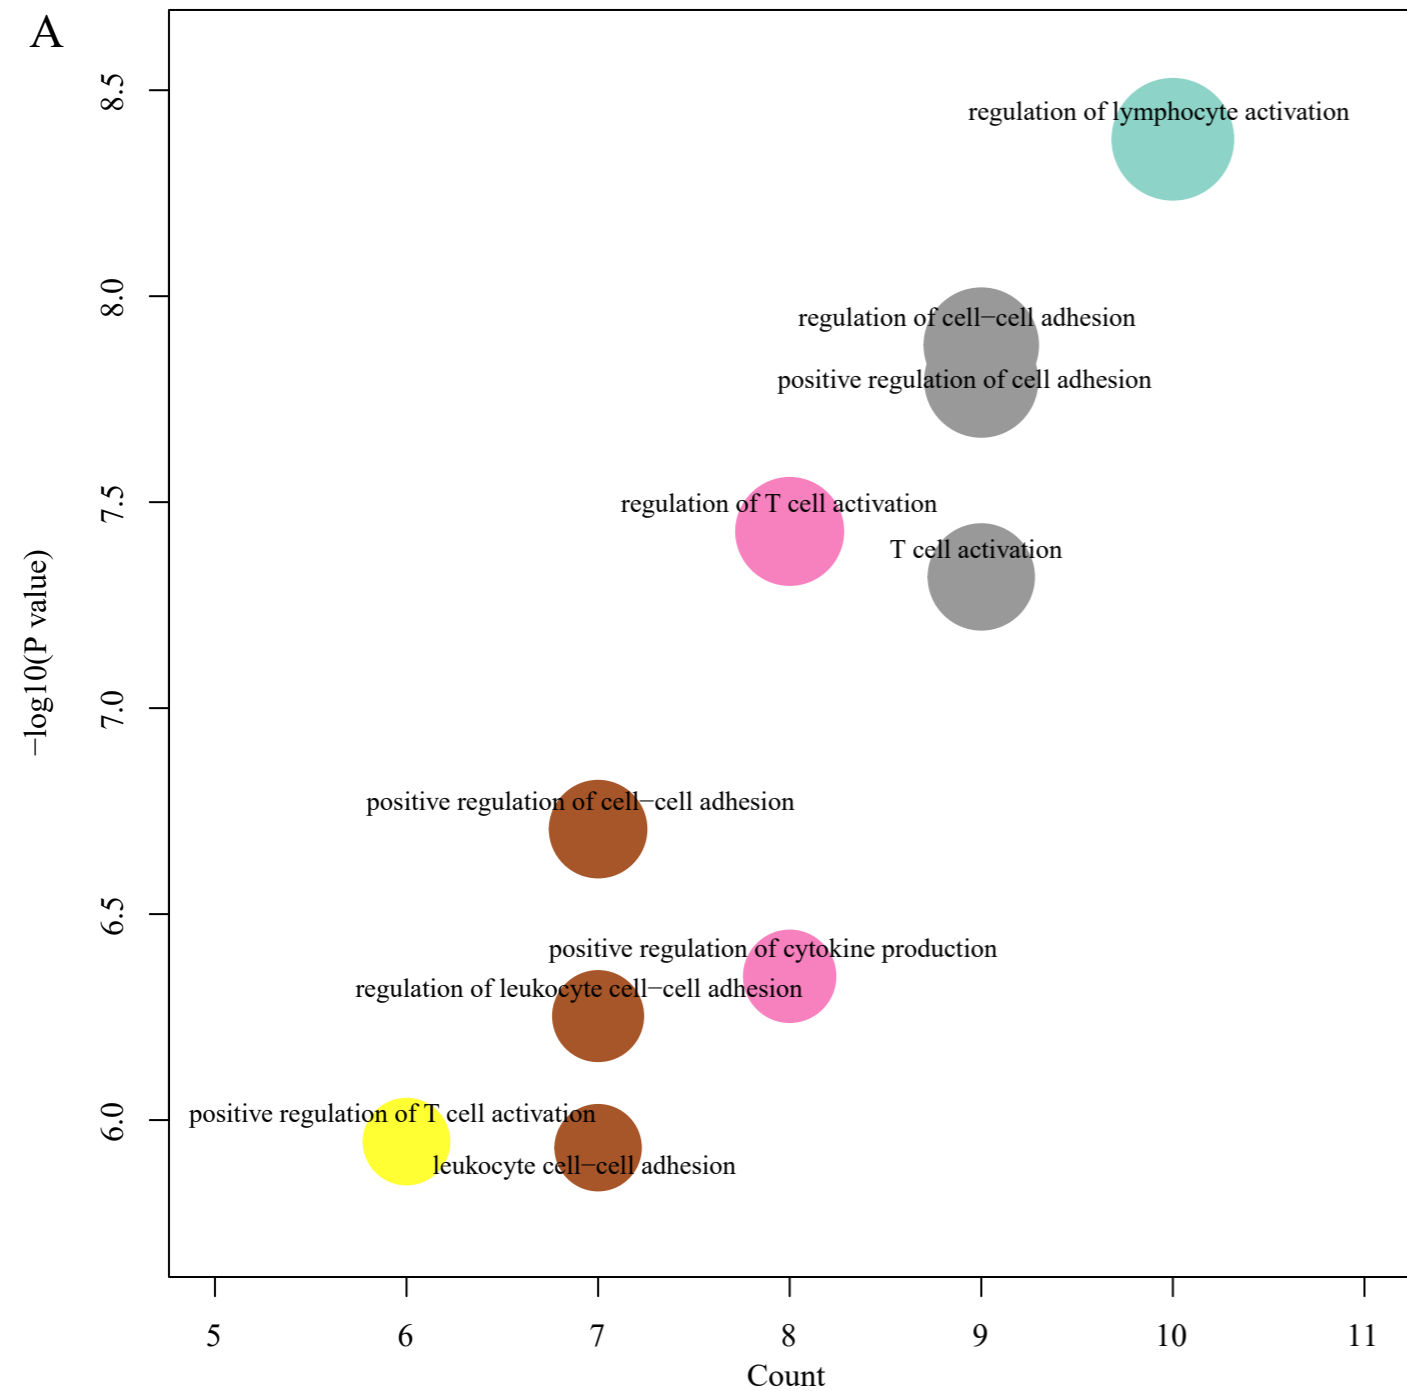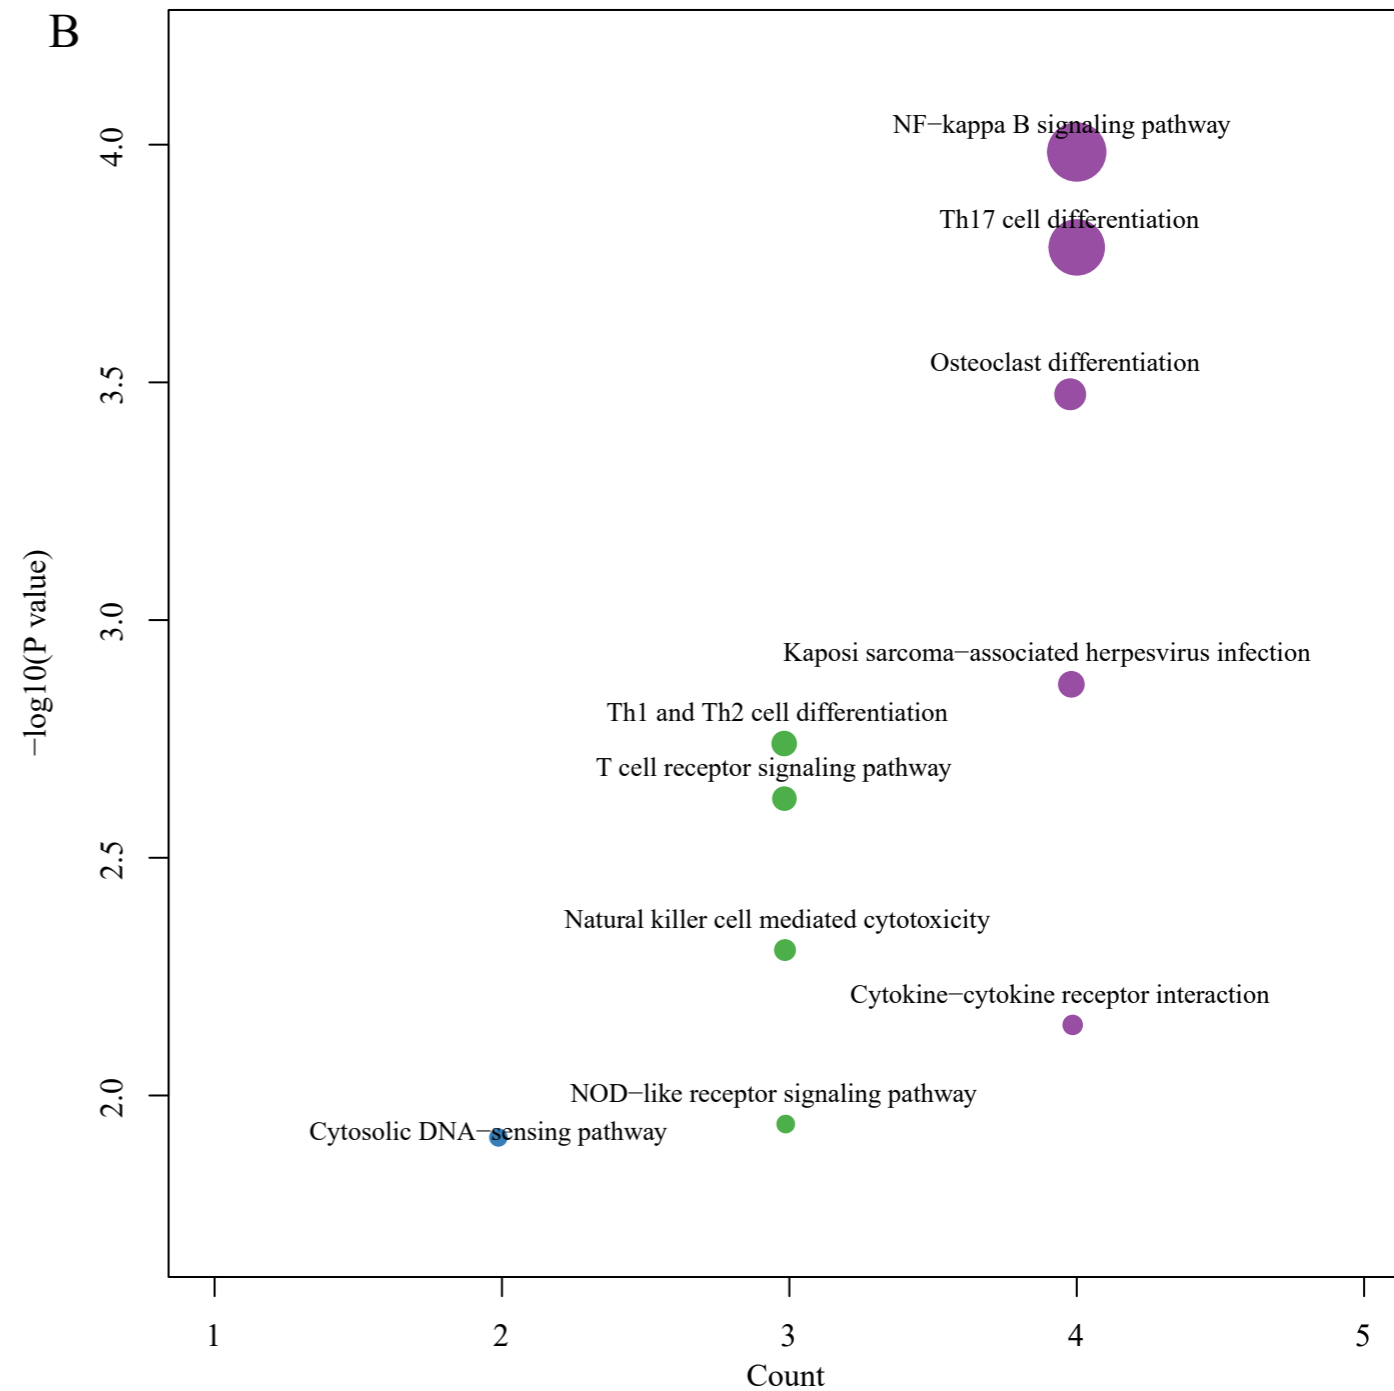

Supplementary figure legend

Figure S1

A: Results of GO enrichment analysis of immune genes in 17-IRGPs. B: Results of KEGG enrichment analysis of immune genes in 17-IRGPs. The horizontal axis represents the number of immune genes, the vertical axis represents the enrichment significance, and the circle represents the pathway.
